# Supplementary material
Source: HighWire-hosted journal article supplement (https://bmjopen.bmj.com/content/11/2/e039122)
Supplement: inline-supplementary-material-1 [file inline-supplementary-material-1.pdf]

## The list of reporting details of data analyses

### 1.The raw data of all outcomes

Live birth rate (LBR), number of oocytes retrieved (NOR), clinical pregnancy rate (CPR), ongoing pregnancy rate (OPR), miscarriage rate (MR), ovarian hyperstimulation syndrome (OHSS) rate, multiple pregnancy rate (MPR), and cycle cancellation rate (CCR). The original data format is ~.csv.

### 2.The analysis software and packages

- R version 4.0.1 (<https://mirrors.tuna.tsinghua.edu.cn/CRAN/>)
- RStudio Version 1.3.959 (<https://rstudio.com/products/rstudio/download/>)
- bayesmeta version 2.5-0 package (<https://cran.r-project.org/web/packages/bayesmeta>)
- gemtc version 0.8-2 package (<https://cran.r-project.org/web/packages/gemtc/>)
- BUGSnet version 1.0.3 (<https://cran.r-project.org/web/packages/BUGSnet/>)
- CINeMA framework (<https://cinema.ispm.unibe.ch/>)

### 3.The R code involved in using the bayesmeta package(pairwise meta analysis)

### 4. The R code involved in using the gemtc package and BUGSnet package (NMA)

### 5.The result of output

- Network of Evidence
  - Network plot of all COH protocols
- Patient Characteristics
  - Assessment of transitivity by patient characteristics
- Model Choice
  - The leverage plots used for comparing fixed-effect and random-effects models
- Assessment of convergence of model
  - The Brooks-Gelman-Rubin diagnosis plot, trace plot and density plot of
- Analysis of heterogeneity
  - Forest plot for the analysis of heterogeneity
- Check inconsistency
  - Evaluation of inconsistency by sidesplitting forest plot
- Results From Pairwise Meta-Analyses
- Results From Network Meta-Analyses
  - Forest plot of relative effect
  - The league table of all comparisons
  - SUCRA plot of treatment rankings
  - Comparison-adjusted funnel plots
- Results of subgroup, meta-regression and sensitivity analyses
- Results of GRADE for the outcomes
